# Supplementary material for: Synergistic dual-interface modification for high-performance CsPbBr3 perovskite solar cells: a combined experimental and modeling study
Source: Royal Society of Chemistry journal article supplement (doi:10.1039/d6ra02943d), 2026-05-26
Supplement: d6ra02943d1.pdf [file d6ra02943d1.pdf]

## Supporting information

# Synergistic Dual-Interface Modification for High-Performance CsPbBr<sub>3</sub> Perovskite Solar Cells: A Combined Experimental and Modeling Study

Xinghua Li<sup>1,2</sup>, Zhongchen Bai<sup>3\*</sup>, Qixin Chen<sup>1,4</sup>, Zhengping Zhang<sup>1\*</sup>

<sup>1</sup> College of Big Data and Information Engineering, Guizhou University, Guiyang City, 550025, China

<sup>2</sup> College of Electronics and Information Engineering, Anshun University, Anshun City, 561000, China

<sup>3</sup> College of Medicine, Guizhou University, Guiyang City, 550025, China

<sup>4</sup> Guizhou Polytechnic of Construction, Guiyang City, 551499, China

\*Correspondence: zcbai@gzu.edu.cn (Z.C. Bai), zpzhang@gzu.edu.cn (Z.P. Zhang).

### List of Supplementary Items

Fig. S1                      Chemical structure of N,N'-Dicyclohexylcarbodiimide (DCC)

Fig. S2                      (a) Adsorption model of DCC on CsPbBr<sub>3</sub>(001) surface;  
(b) Pb–Pb interatomic distances on CsPbBr<sub>3</sub> (001) surface;  
(c) Photograph of synthesized SnO<sub>2</sub> quantum dot solution

Supplementary Note 1      First-principles calculation parameters for DCC adsorption on CsPbBr<sub>3</sub>(001) surface

Fig. S3                      Parameter settings for geometry optimization of DCC adsorbed on CsPbBr<sub>3</sub>

Fig. S4                      Parameter settings for energy calculation of DCC adsorbed on CsPbBr<sub>3</sub>

Fig. S5                      Construction of F-doped SnO<sub>2</sub> models with different doping concentrations

Table S1                     DFT (CASTEP) parameter settings for undoped and F-doped SnO<sub>2</sub>

Fig. S6                      Total density of states (TDOS) of F-doped SnO<sub>2</sub> at different doping concentrations

Fig. S7                      Partial density of states (PDOS) of Sn in F-doped SnO<sub>2</sub>

Fig. S8                      Partial density of states (PDOS) of O in F-doped SnO<sub>2</sub>

Fig. S9 Partial density of states (PDOS) of F in F-doped SnO<sub>2</sub>

- Supplementary Note 2 Experimental details: materials, synthesis of SnO<sub>2</sub> quantum dots, fabrication of CsPbBr<sub>3</sub> PSCs, and characterization methods
- Supplementary Note 3 Derivation of the current–voltage equation for the dual-diode series model (DDSM)
- Supplementary Note 4 Theoretical relationship between CsPbBr<sub>3</sub>/C interface barrier ( $eV_{D1}$ ) and open-circuit voltage ( $V_{OC}$ )
- Supplementary Note 5 Theoretical relationship between SnO<sub>2</sub>/CsPbBr<sub>3</sub> interface barrier ( $eV_{D2}$ ) and fill factor (FF)
- Table S2 SCAPS-1D simulation parameters for ITO, SnO<sub>2</sub>, CsPbBr<sub>3</sub>, and carbon layers
- Table S3 Simulated CsPbBr<sub>3</sub>/C barrier heights ( $eV_{D1}$ ) as a function of CsPbBr<sub>3</sub> electron affinity
- Table S4 Simulated SnO<sub>2</sub>/CsPbBr<sub>3</sub> barrier heights ( $eV_{D2}$ ) as a function of SnO<sub>2</sub> electron affinity
- Table S5 Voltage division ( $V_2$ ) at the SnO<sub>2</sub>/CsPbBr<sub>3</sub> interface under applied bias of 1.34

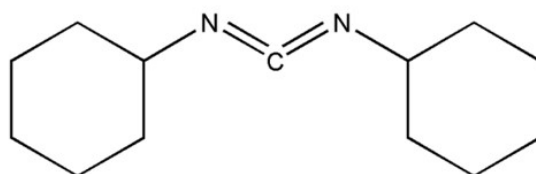

Fig. S1 N, N'-Dicyclohexylcarbodiimide (DCC)

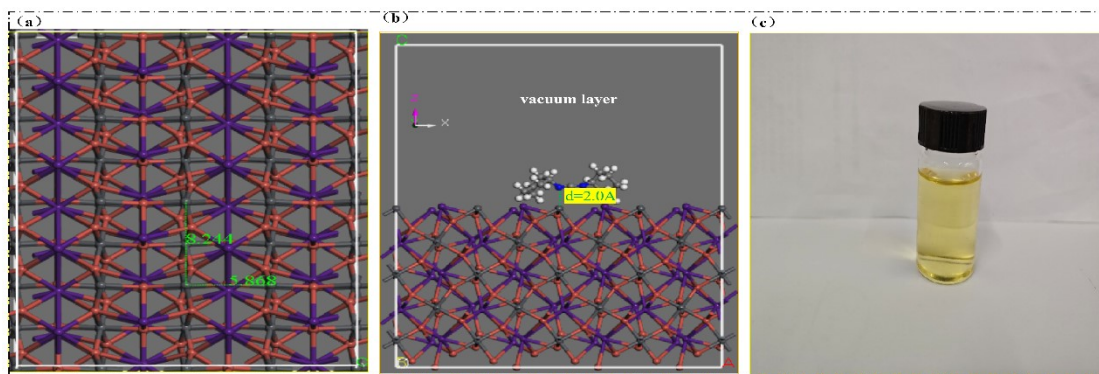

Fig. S2 (a) Model of DCC adsorbed on the CsPbBr<sub>3</sub> surface; (b) Pb–Pb interatomic distances on the CsPbBr<sub>3</sub> (001) surface; (c) SnO<sub>2</sub> quantum dots.

### Supplementary Note 1

The CsPbBr<sub>3</sub>(001) surface was modeled using a (4×3×1) supercell, with a slab thickness of 20 Å and a vacuum layer of 20 Å. The bottom three atomic layers were fixed, and the surface was terminated with PbBr<sub>2</sub>. All calculations were performed using Material Studio.

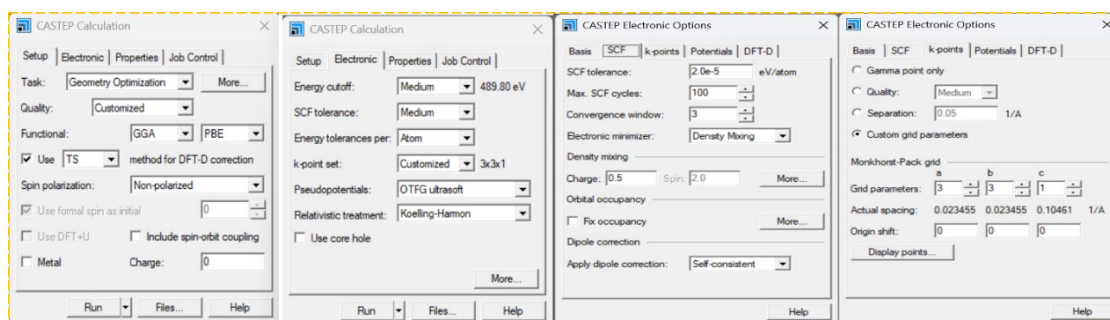

Fig. S3 Parameter settings for Geometry Optimization of DCC adsorbed on CsPbBr<sub>3</sub>

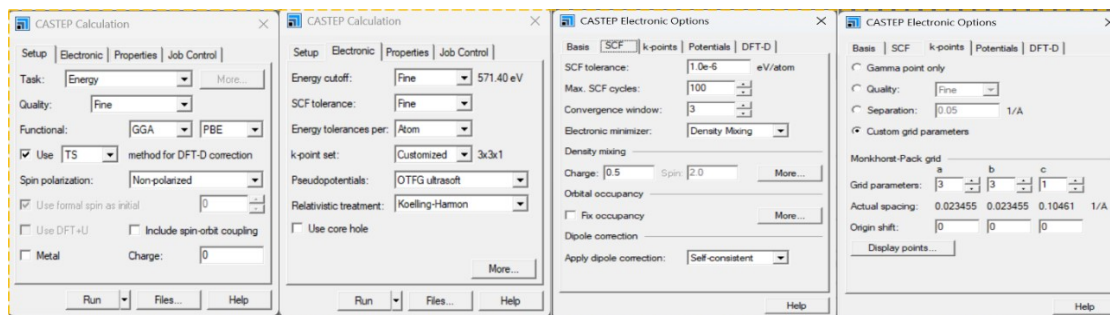

Fig. S4 Parameter settings for Energy of DCC adsorbed on CsPbBr<sub>3</sub>

For the key parameter settings of structure optimization in Fig. S3, the GGA-PBE functional is

adopted. Considering computational performance, ultrasoft pseudopotentials are selected. The self-consistent field (SCF) convergence threshold is set to  $10^{-5}$ , with the key point being the activation of the DFT-D dispersion correction. CsPbBr<sub>3</sub> is a “soft” lattice material, and the stability of its crystal structure largely depends on nonlocal dispersion interactions between Pb<sup>2+</sup> and Br<sup>-</sup> ions, as well as between different octahedral layers. With the inclusion of the dispersion correction, the lattice constants become more consistent with experimental values. For the single-point energy calculation in Fig. S4, the parameter settings are the same as those for structure optimization, except that the SCF precision is increased by a factor of 10 to  $10^{-6}$ .

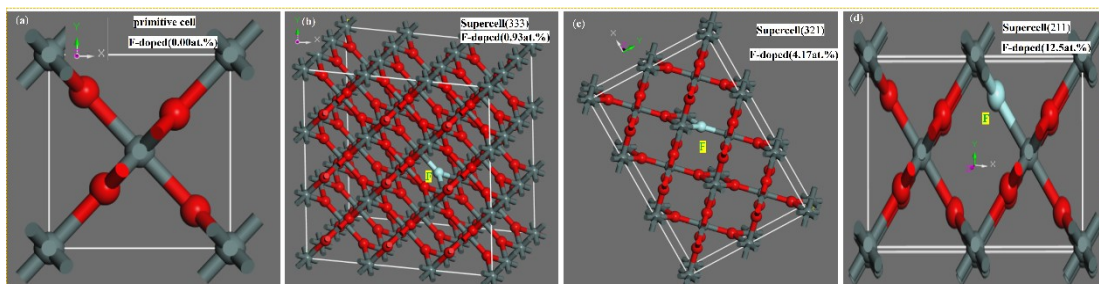

Fig. S5 Construction of SnO<sub>2</sub>-F doping models with different concentrations

**Table S1** DFT (CASTEP) parameter settings for SnO<sub>2</sub>/SnO<sub>2</sub>-F

| Geometry Optimization/Energy |                             |                              |                              |                              |
|------------------------------|-----------------------------|------------------------------|------------------------------|------------------------------|
| Supercell                    | (1×1×1)<br>F-doped(0.0at.%) | (2×1×1)<br>F-doped(12.5at.%) | (3×2×1)<br>F-doped(4.17at.%) | (3×3×3)<br>F-doped(0.93at.%) |
| Quality                      | fine                        | fine                         | fine                         | fine                         |
| Cutoff                       | 571.4                       | 571.4                        | 571.4                        | 571.4                        |
| Pseudop                      | OTfG ultrasoft              | OTfG ultrasoft               | OTfG ultrasoft               | OTfG ultrasoft               |

|            |                                                       |                                                       |                                                       |                                                    |
|------------|-------------------------------------------------------|-------------------------------------------------------|-------------------------------------------------------|----------------------------------------------------|
| potentials |                                                       |                                                       |                                                       |                                                    |
| Functionl  | GGA PBE                                               | GGA PBE                                               | GGA PBE                                               | GGA PBE                                            |
| K-point    | (6×6×4)                                               | (3×6×4)                                               | (2×3×4)                                               | (2×2×2)                                            |
| SCF        | Geometry<br>Optimization<br>:1.0e-5<br>Energy: 1.0e-6 | Geometry<br>Optimization<br>:1.0e-5<br>Energy: 1.0e-6 | Geometry<br>Optimization<br>:1.0e-5<br>Energy: 1.0e-6 | Geometry<br>Optimization :1.0e-5<br>Energy: 1.0e-6 |

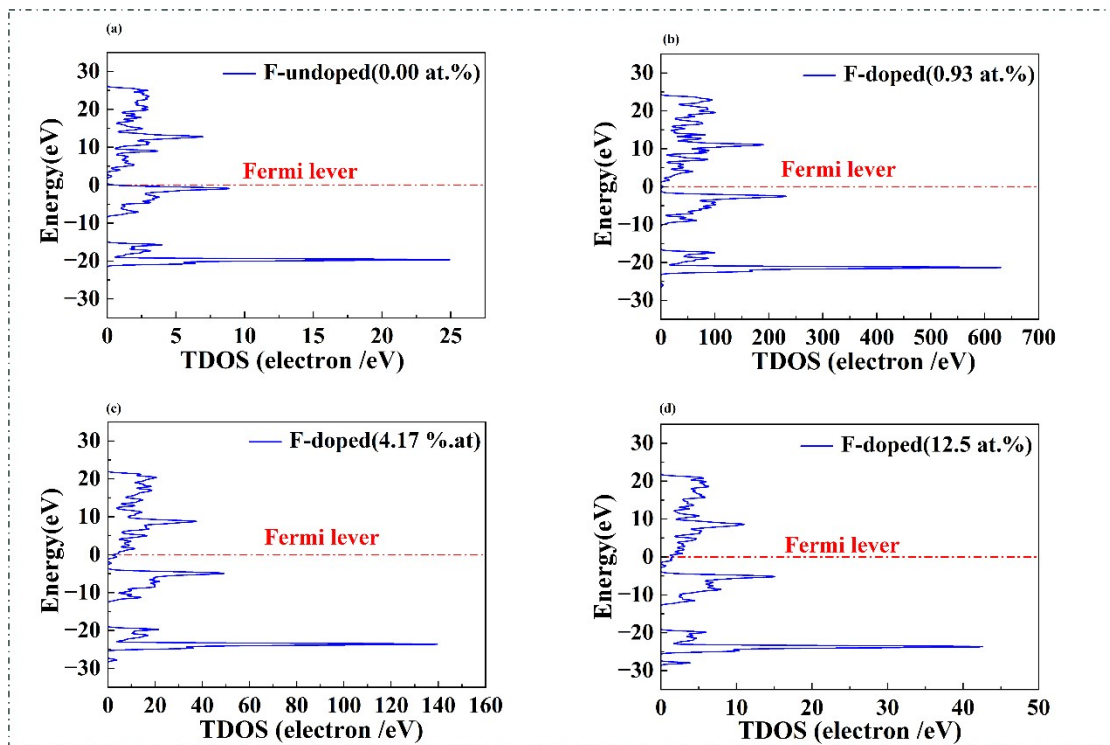

Fig. S6 TDOS

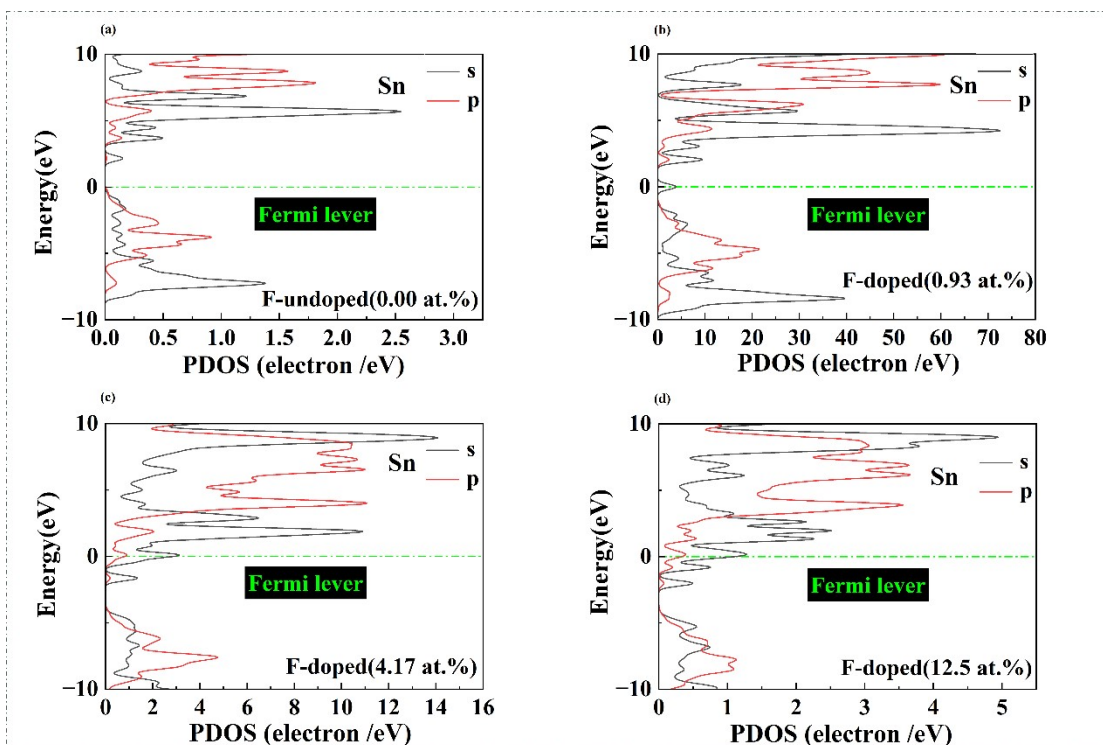

Fig. S7 Sn-PDOS

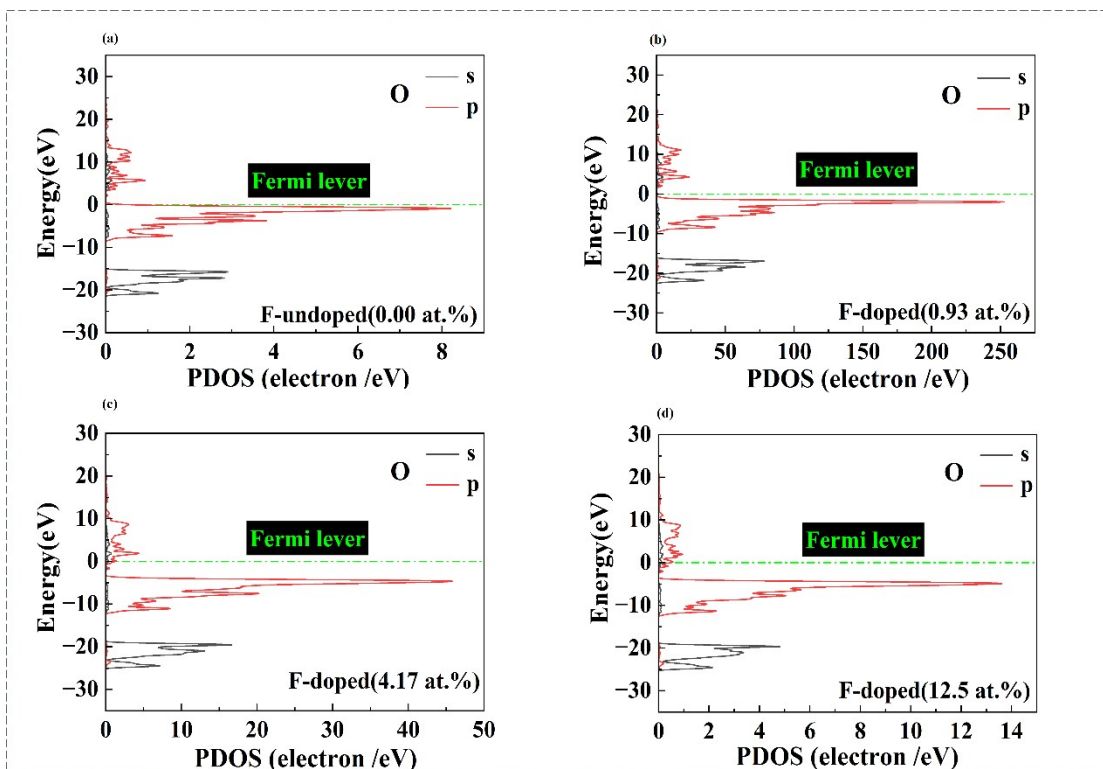

Fig. S8 O-PDOS

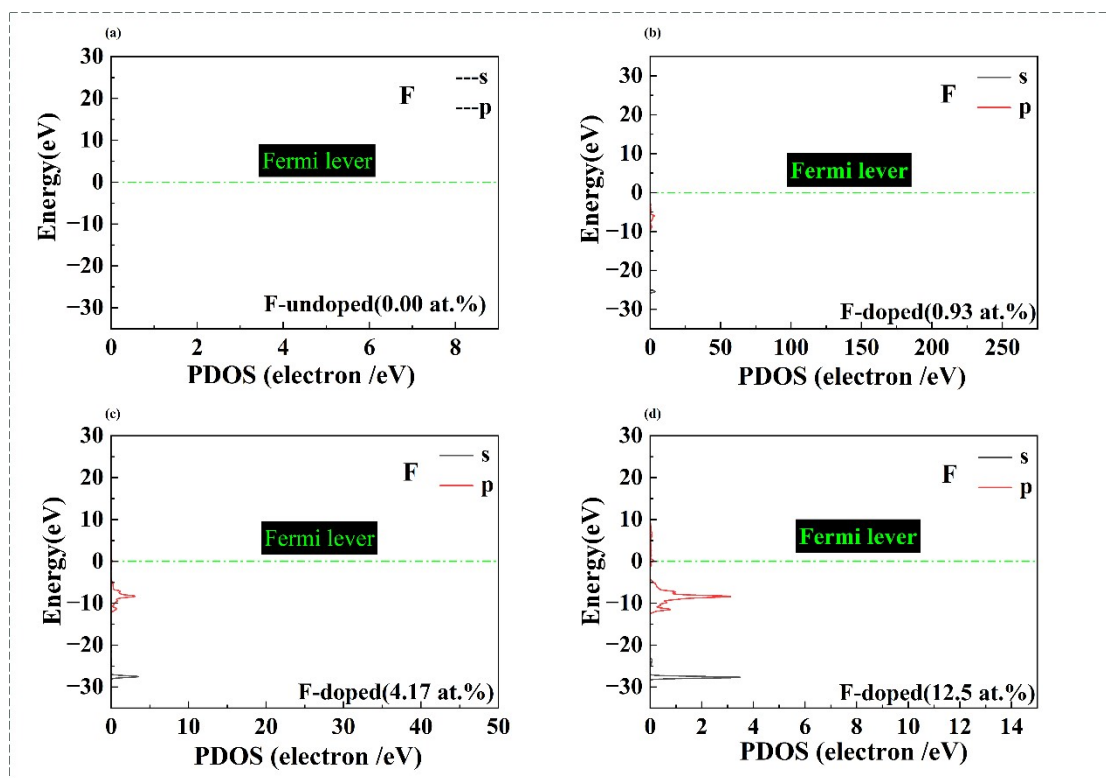

Fig. S9 F-PDOS

## Supplementary Note 2

### Experiment

#### Materials

The chemicals and reagents used in this experiment include:  $\text{PbBr}_2$  (99%),  $\text{CsBr}$  (99%), ammonium fluoride ( $\text{NH}_4\text{F}$ ),  $\text{SnO}_2$  (99%),  $N,N'$ -Dicyclohexylcarbodiimide (DCC) (see Fig. S1),  $N,N$ -dimethylformamide (DMF, 99.9%), carbon tetrachloride ( $\text{CCl}_4$ , 99.9%), ethanol (99%), and isopropanol ( $\geq 99\%$ ). All reagents were purchased from Shanghai Macklin Biochemical Technology Co., Ltd. and were used without further purification.

#### Synthesis of $\text{SnO}_2$ Quantum Dots

0.8532 g anhydrous tin(II) chloride ( $\text{SnCl}_2$ ) and 0.284 g thiourea were added together into a conical flask containing of 30 mL deionized water. The mixture was stirred continuously at room temperature for 36 hours until a pale yellow clear solution formed (see Fig. S2), and then allowed to stand for another 36 hours before further use.

#### Fabrication of HTMs-free carbon-based $\text{CsPbBr}_3$ PSCs

ITO glass substrates were sequentially ultrasonically cleaned in deionized water, ethanol, and isopropanol for 5 minutes each. They were then dried in an oven and treated with ozone for 10

minutes before use.

The electron transport layer (ETL) was fabricated via a spin-coating method. A SnO<sub>2</sub> quantum dot precursor solution was spin-coated onto the surface of a cleaned ITO substrate at 3000 rpm for 30 seconds, followed by annealing on a hotplate at 200 °C for 60 minutes to form the SnO<sub>2</sub> ETL layer.

The SnO<sub>2</sub>/CsPbBr<sub>3</sub> interface modification layer was prepared as follows<sup>[1]</sup>. NH<sub>4</sub>F solutions with different concentrations (0, 0.04, 0.06, and 0.08 M/L in deionized water) were spin-coated on the surface of SnO<sub>2</sub> film at 5000 rpm for 30 seconds, followed by annealing at 150 °C for 30 minutes. The corresponding samples were labeled as the control parameters 0.04-NH<sub>4</sub>F, 0.06-NH<sub>4</sub>F, and 0.08-NH<sub>4</sub>F, respectively.

The CsPbBr<sub>3</sub> perovskite layer was prepared using a two-step method. First, a 1 M/L PbBr<sub>2</sub> solution (in DMF) was spin-coated on the surface of SnO<sub>2</sub> at 2000 rpm for 30 seconds onto the above ETL and then was heated at 90 °C for 30 minutes for Removing DMF solvent. Subsequently, a CsBr solution (2.5 g CsBr dissolved in 10 mL of a mixed solvent with V(water): V(isopropanol) = 9.5:0.5) was spin-coated on the surface of PbBr<sub>2</sub> film at 2500 rpm for 30 seconds, followed by final annealing at 250 °C for 5 minutes to obtain a dense and uniform CsPbBr<sub>3</sub> perovskite film.

The CsPbBr<sub>3</sub>/C interface modification layer was prepared as follows<sup>[2]</sup>, Solutions of DCC at different concentrations (0, 10, 20, and 30 mg/mL in dichloromethane) were spin-coated on the surface of CsPbBr<sub>3</sub> layer at 5000 rpm for 30 seconds, followed by annealing at 100 °C for 10 minutes to remove dichloromethane solvent. The corresponding samples were labeled as the control samples, 10-DCC, 20-DCC, and 30-DCC, respectively.

Finally, the conductive carbon paste was coated onto the surface of DCC modifying layer using a doctor-blade coating method. The electrode area was defined as 0.12 cm<sup>2</sup> through a shadow mask, and the device was heated at 100 °C for 15 minutes to complete the fabrication of the CsPbBr<sub>3</sub> perovskite solar cell.

### **Characterization Methods for Perovskite Solar Cells**

Ultraviolet photoelectron spectroscopy (UPS) measurements were conducted under a bias voltage of 10 V. The J–V characteristics of the devices were tested using a xenon lamp light source to simulate AM 1.5G irradiation (100 mW·cm<sup>-2</sup>), with the effective testing area calibrated to 0.12 cm<sup>2</sup> using a mask. The voltage scanning range was set from 0.1 V to 1.7 V with a step size of 0.01 V, and a delay time of 0.04 s was applied. Electrochemical impedance spectroscopy (EIS) was performed on a AUTOLAB electrochemical workstation with a frequency range from 0.1 Hz to 3.92 MHz and an AC amplitude of 5 mV. The photoluminescence (PL) spectra of perovskite films were recorded with a fiber optic spectrometer (QE6500, Ocean Optics) using a 355 nm wavelength laser (0355–05–01–0020–700, Cobolt Zouk) as the excitation source.

### Supplementary Note 3

#### Establishment of the dual-diode series model (DDSM).

( The parameters are defined as follows:  $V_1$  and  $I_1$  represent the voltage across diode D1 and the current flowing through it, respectively.  $V_2$  and  $I_2$  denote the voltage across diode D2 and the current flowing through it, respectively.  $I_{s1}$  and  $I_{s2}$  are the saturation currents of diodes D1 and D2, respectively;  $V_{D1}$  and  $V_{D2}$  correspond to the barrier heights of diodes D1 and D2, respectively.  $V$  and  $I$  indicate the applied voltage and current in the series circuit, respectively.)

$$I_1 = I_{s1} [e^{(qV_1/KT)} - 1] \quad (1)$$

$$I_2 = I_{s2} [1 - e^{(-qV_2/KT)}] \quad (2)$$

$$V = V_1 + V_2 \quad (3)$$

$$I_{s1} \propto e^{(-\frac{qV_{D1}}{KT})}, I_{s2} \propto e^{(-\frac{qV_{D2}}{KT})} \quad (4)$$

From the equation for series current ( $I_1 = I_2$ ), we can obtain.

$$I_{s1} e^{\frac{qV_1}{KT}} - I_{s1} = I_{s2} - I_{s2} e^{\frac{-q(V - V_1)}{KT}} \quad (5)$$

The following formula is derived from (5).

$$e^{\frac{qV_1}{KT}} = \frac{I_{s1} + I_{s2}}{I_{s1} + I_{s2} e^{\frac{-qV}{KT}}} \quad (6)$$

Substituting into (1) yields.

$$I = I_1 = I_{s1} \frac{I_{s1} + I_{s2}}{I_{s1} + I_{s2} e^{\frac{-qV}{KT}}} - I_{s1} \quad (7)$$

$$I = I_{s1} \left( \frac{I_{s1} + I_{s2}}{I_{s1} + I_{s2} e^{\frac{-qV}{KT}}} - 1 \right) = I_{s1} \left( \frac{I_{s1} + I_{s2} - I_{s1} - I_{s2} e^{\frac{-qV}{KT}}}{I_{s1} + I_{s2} e^{\frac{-qV}{KT}}} \right) \quad (8)$$

$$I = I_{s1} \frac{I_{s2} - I_{s2} e^{\frac{-qV}{KT}}}{I_{s1} + I_{s2} e^{\frac{-qV}{KT}}} \quad (9)$$

$$I = I_{s1} I_{s2} \frac{1 - e^{\frac{-qV}{KT}}}{I_{s1} + I_{s2} e^{\frac{-qV}{KT}}} \quad (10)$$

#### Supplementary Note4

##### The relationship between the CsPbBr<sub>3</sub>/C interface barrier ( $eV_{D1}$ ) and $V_{oc}$ .

Since the interfacial barrier  $eV_{D1} \gg eV_{D2}$ , under an applied voltage  $V$ , the interfacial voltage satisfied  $V_1 \gg V_2$ . In other words, the applied voltage  $V$  was primarily distributed across diode D1 (interface CsPbBr<sub>3</sub>/C) and was approximately equal to  $V_1$ . Combining equations (2) and (10), the I-V relationship satisfies.

$$I = I_1 \approx I_{s1} [e^{\left(\frac{qV}{KT}\right)} - 1] \quad (11)$$

When  $e^{\left(\frac{qV}{KT}\right)} \gg 1$ , the I-V relationship satisfied.

$$I \approx I_{s1} e^{\left(\frac{qV}{KT}\right)} \quad (12)$$

Under open-circuit conditions, the current satisfies  $I = I_{sc}$ , and  $e^{\left(\frac{qV_{oc}}{KT}\right)} \gg 1$  (where  $V_{oc}$  was the open-circuit voltage, and  $I_{sc}$  is the photogenerated current.). Combining equations (4) and (12), the open-circuit voltage  $V_{oc}$  and the barrier height  $eV_{D1}$  satisfied the following relationship.

$$I_{sc} = C e^{\left(\frac{-qV_{D1}}{KT}\right)} e^{\left(\frac{qV_{oc}}{KT}\right)} \quad (13)$$

$$e^{\left(\frac{qV_{oc}}{KT}\right)} = \frac{I_{sc}}{C} e^{\left(\frac{qV_{D1}}{KT}\right)} \quad (14)$$

$$V_{oc} = \frac{KT}{q} \ln \frac{I_{sc}}{C} + V_{D1} \quad (15)$$

The relationship between the barrier height  $eV_{D1}$  ( $q=e$ ) and the Fermi level satisfied.

$$V_{D1} = \frac{E_{f(CsPbBr3)} - E_{f(C)}}{q} \quad (16)$$

Combining equations (15) and (16), we could obtain.

$$V_{oc} = \frac{KT}{q} \ln \frac{I_{sc}}{C} + \frac{E_{ef(CsPbBr3)} - E_{ef(C)}}{q} \quad (17)$$

Under the condition that the photogenerated current  $I_{sc}$  and the Fermi level of carbon was unchanged, equation (17) simplifies to.

$$\Delta V_{oc} = \frac{\Delta V_{D1}}{q} = \frac{\Delta E_{ef(CsPbBr3)}}{q} \quad (18)$$

According to Equations (17) and (18), the  $V_{oc}$  was increased linearly with the increase of the  $eV_{D1}$ .

### Supplementary Note 5

#### The relationship between the $\text{SnO}_2/\text{CsPbBr}_3$ interface barrier ( $eV_{D2}$ ) and FF.

Under ideal conditions, when  $V_1 \gg V_2$ , the total voltage  $V \approx V_1$ , and the current -voltage characteristics of the device can be described by Equation (11).

In the actual system, however, the  $\text{SnO}_2/\text{CsPbBr}_3$  interface induced a voltage  $V_2$ , so the current – voltage relationship was followed Equation (110).

$$I = \frac{I_{s1}I_{s2}(1 - e^{-qV/kT})}{I_{s1} + I_{s2}e^{-qV/kT}}$$

thereby deviating from the ideal diode behavior. This deviation constituted a key factor responsible for the reduction in the FF of the device.

In the DDSM based on the  $C/\text{SnO}_2/\text{CsPbBr}_3$  structure, since the series currents were equal ( $I_1 = I_2$ ), the interfacial voltage  $V_1$  and  $V_2$  satisfy the following relationship.

$$I_{s1} \left[ e^{\frac{qV_1}{kT}} - 1 \right] = I_{s2} \left[ 1 - e^{-\frac{qV_2}{kT}} \right], V = V_1 + V_2$$

When the Fermi level of  $\text{SnO}_2$  was shifted relative to that of  $\text{CsPbBr}_3$ , according to the barrier

relation  $V_{D2} = \frac{E_{f,CsPbBr3} - E_{f,SnO2}}{q}$ , the  $\text{SnO}_2/\text{CsPbBr}_3$  interface barrier  $eV_{D2}$  increases

correspondingly, leading to a decrease in the reverse saturation current  $I_{s2}$  (Equation (4)). In this series configuration, voltage  $V_1$  was decreased while  $V_2$  increasing, thereby reducing the FF.

When the  $eV_{D2}$  was small, the increase in  $V_2$  was limited, and the FF was declined gradually. However, when the  $eV_{D2}$  was large,  $I_{s2}$  became extremely small, causing the current to approximately satisfy the saturation condition.

$$I_{s1} \left[ e^{\frac{qV_1}{kT}} - 1 \right] \approx I_{s2}$$

Consequently, the I–V curve exhibited a pronounced “plateau” characteristic, manifesting as an “S-shaped” distortion that severely deviated from ideal diode behavior, leading to a sharp drop in the FF.

**Table S2** SCAPS-1D parameter settings (original)<sup>[3, 4]</sup>

| parameter                     | ITO                  | SnO2                  | CsPbBr3               | C |
|-------------------------------|----------------------|-----------------------|-----------------------|---|
| thickness(nm)                 | 500                  | 450                   | 800                   |   |
| $E_g$ [eV]                    | 3.5                  | 3.6                   | 2.3                   |   |
| $X$ [eV]                      | 4                    | 4.0                   | 3.6                   |   |
| $\epsilon_r$                  | 9                    | 9                     | 6.5                   |   |
| $N_C$ [cm <sup>-3</sup> ]     | $2.2 \times 10^{18}$ | $4.36 \times 10^{18}$ | $4.94 \times 10^{17}$ |   |
| $N_V$ [cm <sup>-3</sup> ]     | $1.8 \times 10^{19}$ | $2.52 \times 10^{19}$ | $8.47 \times 10^{18}$ |   |
| $\mu_n$ [cm <sup>2</sup> /Vs] | 20                   | 20                    | 4500                  |   |
| $\mu_p$ [cm <sup>2</sup> /Vs] | 10                   | 10                    | 4500                  |   |
| NA[cm <sup>-3</sup> ]         |                      |                       |                       |   |
| $N_D$ [cm <sup>-3</sup> ]     |                      | $2.0 \times 10^{19}$  | $1.0 \times 10^{15}$  |   |
| Workfunction(eV)              |                      |                       |                       | 5 |

**Table S3** Simulation of CsPbBr3/C barrier (Set the electron affinity (X) of CsPbBr3 to the parameters in the following table, with other parameters remaining the same as in the original table data)

| $X$                    | 4.0ev    | 3.9ev   | 3.8ev   | 3.7ev   | 3.6ev   | 3.5ev   | 3.4ev   |
|------------------------|----------|---------|---------|---------|---------|---------|---------|
| CsPbBr <sub>3</sub> /C | 0.8396eV | 0.939eV | 1.039eV | 1.139eV | 1.239eV | 1.339eV | 1.439eV |

**Table S4** Simulation of SnO<sub>2</sub>/CsPbBr<sub>3</sub> barrier (Set the electron affinity (X) of SnO<sub>2</sub> to the parameters in the following table, with other parameters remaining the same as in the original table data)

|                                                           |       |        |        |        |        |
|-----------------------------------------------------------|-------|--------|--------|--------|--------|
| X                                                         | 3.8ev | 3.9ev  | 4.0ev  | 4.1ev  | 4.2ev  |
| SnO <sub>2</sub> /CsPbBr <sub>3</sub> (eV <sub>D2</sub> ) | 0eV   | 0.08eV | 0.18eV | 0.28eV | 0.38eV |

**Table S5** Voltage division at the SnO<sub>2</sub>/CsPbBr<sub>3</sub> interface.

|                   |   |            |            |            |            |
|-------------------|---|------------|------------|------------|------------|
| eV <sub>D2</sub>  | 0 | 0.08187557 | 0.18167470 | 0.28153164 | 0.38141575 |
| eV' <sub>D2</sub> | 0 | 0.08187741 | 0.18171391 | 0.2831724  | 0.41718307 |
| V <sub>2</sub>    | 0 | 0.00000184 | 0.00003921 | 0.00164076 | 0.03576732 |

Table 4 shows the interface voltage division  $V_2$  at the SnO<sub>2</sub>/CsPbBr<sub>3</sub> interface when the applied voltage is 1.34V (the open-circuit voltage value). The  $V_2$  values in the table are derived from the following relationship:

$$V_2 = \frac{eV'_{D2} - eV_{D2}}{e}$$

(In the formula,  $eV_{D2}$  and  $eV'_{D2}$  represent the SnO<sub>2</sub>/CsPbBr<sub>3</sub> interface barrier potentials when the applied voltage V is 0 and 1.34, respectively.)

- [1] Jung E H, Chen B, Bertens K, Vafaie M, Teale S, Proppe A, Hou Y, Zhu T, Zheng C, Sargent E H (2020) Bifunctional Surface Engineering on SnO<sub>2</sub> Reduces Energy Loss in Perovskite Solar Cells. ACS Energy Letters 5:2796-2801. <http://dx.doi.org/10.1021/acseenergylett.0c01566>.
- [2] Zhu J, Liu Y, He B, Zhang W, Cui L, Wang S, Chen H, Duan Y, Tang Q (2022) Efficient interface engineering of N, N'-Dicyclohexylcarbodiimide for stable HTMs-free CsPbBr<sub>3</sub> perovskite solar cells with 10.16%-efficiency. Chemical Engineering Journal 428. <http://dx.doi.org/10.1016/j.cej.2021.131950>.
- [3] Zhao P, Lin Z, Wang J, Yue M, Su J, Zhang J, Chang J, Hao Y (2019) Numerical Simulation of Planar Heterojunction Perovskite Solar Cells Based on SnO<sub>2</sub> Electron Transport Layer. ACS Applied Energy Materials. <http://dx.doi.org/10.1021/acsaem.9b00755>.
- [4] Baro M, Borgohain P (2025) Design and performance analysis of [formula omitted] perovskite solar cells: Insights from SCAPS-1D device simulations. Renewable Energy. <http://dx.doi.org/10.1016/j.renene.2025.124225>.
